# Supplementary material for: Kozak Similarity Score Algorithm Identifies Alternative Translation Initiation Codons Implicated in Cancers
Source: MDPI journal article supplement (doi:10.3390/ijms231810564), 2022-09-12
Supplement: s1 [file s1]

### Supplemental File 1. Predicted Upstream TICs Identified in Cancer Genes.

Below are the 5'UTRs of mRNAs from genes overexpressed in cancer. Codons colored in red have KSSs  $\geq 0.8$ . Upstream ATGs that may be used for translation are bolded. Potential alternative TISs are followed by their KSS score. NCBI Nucleotide accession numbers for each sequence are in parentheses.

#### **EPHA4** (NM\_001304536.2)

ACGCGTGCTCATCTTGTGTAAAAGTAAAAGTTGCTCATGTCATTAGCTCGGCTCTGAGTTTGCATGAGA  
sAACCAGCGCAGCTCTCGAGCCACGGGAGAAAACACGATCTGCTGCGGAGCCCAGTGACCTGAAACT  
GTAGCAGTGACTCGAGACCTGTCCTCTCCTCGACGTGCCCCATAACCCTCCCGCTTTATTTAGGATCC  
GCTTTTCCGAGAGCAGCCACTCAGGCAACCCCCGGAAGAAGCGGCAGGAGCAGCG**TTG(0.82)**GCACC  
GGCGAACC

#### **YY1** (NM\_003403.5)

CTCCCTCTGCCTTCCTTCCCCACGGCCGGCCGCTCCTCGCCCGCCCGCCCGCAGCCGAGGAGCCGAG  
GCCGCCGCGGCC**GTG(0.91)**GCGGCGGAGCCCTCAGCC

#### **ERBB2** (NM\_004448.4)

CCCCTCCATTGGGACCGGAGAAACC**AGG(0.87)**GGAGCCCCCGGGCAGCCGCGCGCCCCCTTCCCACG  
GGGCCCTTTACTGCGCCGCGCGCCCGGCCCCACCCCTCGCAGCACCCCGCGCCCCGCGCCCTCCCA  
GCCGGGTCCAGCCGGAGCC**ATG(0.86)**GGGCCGGAGCCGCAGTGAGCACC

#### **FOX2** (NM\_001031695.4)

CTTCAGCCATCTGCCTGAGATATGGGAGGGAGCTGGAGAAAG**AAG(0.81)**GAGGGGGAGAGACTGCC  
AGAGAGGAAGAGAAAAGAAAGGAAGAAACATTAGAAAGAAAAAGGAAGGAAAACGGTATAAAGAG  
AGATCAATTACCCACCCTTAAATAGCTAGATTGGGGGGGGAGGGGGGTGGAAAAGAAAGCTGTGGA  
GGTGTGCCCCAGC**ACG(0.88)**GCTGCTTTGAAAGGTTTATCATCTATCCGTTTGTTT

#### **KIT** (OM304357.1)

TCTGGGGGCTCGGCTTTGCCGCGCTCGCTGCACTTGGGCGAGAGCTGGAAC**GTG(0.82)**GACCAGAGC  
TCGGATCCCATCGCAGCTACCGCG

**AXL** (NM\_021913.5)

GAGAAGGCGGCTGCTGGGCAGAGCCGGTGGCAAGGGCCTCCCCTGCCGCTGTGCCAGGCAGGCAGT  
GCCAAATCCGGGGAGC**CTG(0.87)**GAGCTGGGGGGAGGGCCGGGGACAGCCCGGCCCTGCCCCCTCC  
CCCGCTGGGAGCCCAACAACCTTCTGAGGAAAGTTTGGCACCC

**MYC** (NM\_002467.6)

AACTCGCTGTAGTAATTCCAGCGAGAGGCAGAGGGAGCGAGCGGGCGGCCGGCTAGG**GTG(0.80)**GA  
AGAGCCGGGCGAGCAGAGCTGCGCTGCGGGCGTCCTGGGAAGGGAGATCCGGAGCGAATAGGGGG  
CTTCGCCTCTGGCCCAGCCCTCCCGCTGATCCCCAGCCAGCGGTCCGCAACCCTTGCCGCATCCACG  
AACTTTGCCCATAGCAGCGGGCGGGCACTTTGCACTGGAACCTACAACACCCGAGC**AAG(0.84)**GAC  
GCGACTCTCCCGACGCGGGGAGGCTATTCTGCCCATTTGGGGACACTTCCCGCCGCTGCCAGGACCC  
GCTTCTCTGAAAGGCTCTCCTTGCACTGCTTAGACG

**MET** (NM\_001127500.3)

AGACACGTGCTGGGGCGGGCAGGCGAGCGCCTCAGTCTGGTCGCCTGGCGGTGCCTCCGGCCCCAA  
CGCGCCCCGGGCCGCCGCGGGCCGCGCGCGCCGATGCCCGGTGAGTCACTGGC**AGG(0.82)**GCAGCG  
CGCGTGTGGGAAGGGGCGGAGGGAGTGCGGCCGCGGGCGGGCGGGGCGCTGGGCTCAGCCCGGC  
CGCAGGTGACCCGAGGCCCTCGCCGCCCGCGGCGCCCCGAGCGCTTTGTGAGCAGATGCGGAGCC  
GAGTGGAGGGCGCGAGCCAGATGCGGGGCGACAGCTGACTTGCTGAGAGGAGGCGGGGAGGCGCG  
GAGCGCGCGTGTGGTCCTTGCGCCGCTGACTTCTCCACTGGTTCCTGGGCACCGAAAGATAAACCTCT  
CATA

**HP** (AF026219.1)

CCCAGCCAGGAC**ATG(0.81)**GCCGCACCTCTCCTCATCAGGAGCGCCGGCTCACGGACTTCTCGCCCA  
ACTCCCTGAGCGCTCCCTCGTTTCGATCTTTAGAAAACCCTGCTTTCTTTCTGGGGCCGTGACG**AGG(0.82)**  
**GGCAGGGAGCGGCGAGCAAG(0.90)**GATGCGTTGAGGACCGCGAGGGCGCGCGTCTCGGGTGCCG  
**CCGTG(0.86)**GGTCCCGACGCGGAAGCCGAGCCGCCTCCGCCTGCCTCGACTTCCCCACAGCGTTCC  
GCCGCCGCCTGCCGTGCTTGATGTGCAGAAAGAAGCCGGACACC

**EPHA1** (NM\_005232.5)

GCAAC**CTG(0.80)**GCGCTGCCATCCGGGCCACTGTCCCAGGTCCCGGCCCGGAGCT

**MYCN** (NM\_001293228.2)

AGGCTGTGACAGTCATCTGTCTGGACGCGCTGGGTGGATGCGGGGGGCTCCTGGGAACCTGTGTTGGA  
GCCGAGCAAGCGCTAGCCAGGCGCAAGCGCGCACAGACTGTAGCCATCCGAGGACACCCCCGCCCC  
CCCGGGCCACCCGGAGACACCCGCGCAGAATCGCCTCCGGATCCCCTGCAGTCGGCGGGAGGTAAG  
GAGCAGG(0.83)GCTTGCAAACCGCCCGGCGCCAGGGAAGCGACGAGCGCCGGGGCAAGGCAAGC  
CTG(0.80)GACGGGATT(0.82)GCGACGTGCGCACCGGGCGCCCTAATATGCCCCGGGGGACTGTTTCT  
GCTTCCGAAACAAAACCATCTCTGGGTTTTCCAGAAAAGCCAGTTCAGCCCCGAAGGCATCTG(0.  
87)GCTAGAGGAGACCCGCCCTAATCCTTTTGAGCCCTTACCGGGGGGAGTAATGGCTTCTGCGAAA  
AGAAATTCCCTCGGCTCTAGAAGATCTGTCTGTGTTTGAGCTGTGCGAGAGCCGTGTTGGAGGTCGGC  
GCCGGCCCCCGCCTTCCGCGCCCCCCCACGGGAAGGAAGCACCCCCGGTATTAACGAACGGGGCG  
GAAAGAAGCCCTCAGTCGCCGGCCGGGAGGCGAGCCG

**FOXM1** (NM\_202002.3)

AACGCTCCGCCGGCGCCAATTTCAAACAGCGGAACAACTGAAAGCTCCGGTGCCAGACCCACCCC  
CGGCCCCGGCCCGGACCCCTCCCTCCCGGGATCCCCGGGGTTCACCCCGCCCGCACCGCCG  
GGGACCCGGCCGGTCCGGCGCGAGCCCCCGTCCGGGGCCCTG(0.84)GCTCGGCCCCCAGGTTG(0.85)  
GAGGAGCCCGGAGCCCGCCTTCGGAGCTACGGCCTAACGGCGGCGGCGACTGCAGTCTGGAGGGTC  
CACACTTGTGATTCTCAATGGAGAGTGAAAACGCAGATTCATA

**KPNA2** (NM\_001320611.2)

GTTGACTAGGCCTCGGGGGCGACGTTTATTGACCAGGCGGCTGAGTTTCGCGGGGTCTGCGGGTTTA  
GGGCGCCGACGCTCTGCAAACGGCAGCGGAGGCCTTAACGCGTCGCGGCCGGGAGAATCGGAGCGA  
GCCAGGCTTGAGGGCGAATGTCCCGGGAGGACTTGTGGCGGCCCTG(0.81)GTTTCGCCTCCTCCTTC  
TCGTTGCATCTTCCCCGGCCTG(0.83)GGGGCAGGGGCTGGGGGTGGCAGTTGGGAGCACCGTCTCTG  
ACACCTAGGCCCCGGGGGTGGCTCTGCCACCAG(0.84)TCGTAGGCGAGCGTAATGAAAGCAAAGAT  
AGCAAATTGTAAGGAGGGCTTTGACTTTTGTATCTTCTGAATGACGCACAGCTGATGTCATCCTAATT  
AAGCGCATTCACTCCTAGTCTCTGGAAATGCAATCAAATATGCGAGATGCGGCACTGCATTTTAAATG  
TTGACCATAATGTAATGATGAAGCAAATTTTATTTAATTTTCGAGTCTGCACCTATTTTGGCCAAGTAA  
AGACAGTAAAATAGGGAGAGCCTCCTGAGGATCTGAATTTATTGCCCTGGCACATAATTTTAGCTCTT  
TCTCCCTTTGTCTCATAACC

**STAMBP** (NM\_006463.6)

GTTTCCGGAACCTCCGGGTGTCATCCGCGGGGAAAGGTGGGGAAGGGTCCCGGGAACCTG(0.88)GTG  
GGGCAGG(0.80)GCCTCCGAGCGTGGTTGACTTTGAAGGGGATCGGCCGCCATGCTGCATCCCCTTTT

TGGAATTGCTCAACCAGGTGGTAACCGGCGCCGCTTCCTGGCCTTGGGAGGTGGTTCCTTTCTTAACCC  
ACAAGAACCTCTCCCAAGAGAACTTGGTCCTG

**MAP3K8** (NM\_005204.4)

ACTCGTCCGCTCCGCTCTGGACTGCGCGCCACGCTCTGGGGTCCGGCGCCCTG(0.82)GTTTCCTGCTTCT  
GCCGCTGCCGCCGCCGGATCCCACTGGCCCCGGCGTGCTCGGCTCCACAGGCCTGCAGCCAGCATC(9  
0)GCACCGAACCTTCGGGGGGCGCGGCTGGAGCGCTCGGCCGGCCTG(0.83)GGAGCGCCAAAG(0.85)  
GCCGCAGATGCAATCTTCTTACCGCGAAGAAGCCAGGGGAATAGGTAGCCACATCTTGTTCAGATA  
AGAAAGGAAGCTAACGCAGTATCTGCAAAGCCAGGAGTCTGACTCAGTACTTTTCTCACTCATGCATA  
CAAAGCAGCTAAAAATGACACAGCTTATTTACCATGCCCTGACACTGCACTGAGCACTTTATGAGCTT  
GAACTCTGTTAATCCTCACGACCACCTCATGAGACTCTCCAGAAAGAGCAACAGTA

**CDKN3** (NM\_005192.4)

ACCGGTGAGTCGCCGGCGCTGCAGAGGGAGGCGGCACTGGTCTCGACCTG(0.80)GGGCGGCCAGCG

**ADAR** (NM\_001111.5)

GAACCGGAGCCATCTTG(0.88)GGCCCCGGCGCGCAGACCCGCGGAGTTTCCCGTGCCGACGCCCCGGG  
GCCACTTCCAGTGCGGAGTAGCGGAGGCTG(0.81)GGGGCCTCGAGGGGCTGGCGCGGCCAGCGG  
TCGGGGCCAGG(0.80)GTCGTGCCGCCGGCGGGTCGGGCCGGGCAATGCCTCGCGGGCGCA

**RCC1** (NM\_001048194.4)

AGAGGCCTGCAGAGCGCATGCTCTGGGGCAGTTCGCGGCCCGGCGGGGAGCGCCGGAGTTCCTTGT  
GGCCGACGTGCACCAG(0.85)GACAGGAAG

**COL11A1** (NM\_001854.4)

ACTGACGGCATGAAGCCTTTAGGGGCACACAGTACTCTCAGCTTGTTGGTGGAAGCCCCTCATCTGCC  
TTCATTCTGAAGGCAAG(0.81)GCCCCGGCAGAGGAAGGATCAGAGGGTCGCGGCCGGAGGGTCCCCG  
CCGGTGGGGCCAACTCAGAGGGAGAGGAAAGGGCTAGAGACACGAAGAACGCAAACCATCAAATTT  
AGAAGAAAAAGCCCTTTGACTTTTTCCCCCTCTCCCTCCCCAATGGCTGTGTAGCAAACATCCCTGGCG  
ATACCTTG(0.85)GAAAGGACGAAGTTGGTCTGCAGTCGAATTCGTGGGTTGAGTTCACAGTTGTGA  
GTGCGGGGCTCGGAG

**BUD31** (NM\_003910.4)

GTCGAGAAGCAGCTACCCAAGCTCCAGGAGCTTCCGGTATGTGTTTTCCCTCTGTTCTCGATTACCTTG(0.86)GCAACGGCTGAGGCGGGAGACCGGTGGTCTGCACCGTCCTG(0.80)GAGGGAGATATGAGTGGCTGGACTCTCAGCCAGCCACTGGGATGTGTTCTGGGCTTTGGACCTTGAGGCCGGAGAGAGCTCCCGAGAGGAGGCGGCGCCACGTTCTGTTCTTCTGAGGGGACGGTAGATTTGGGGGTTTTCTCTAGGATTCTCGCGCCGTTTCTCTGAAGAAACAGGACCAGAGAGGGAAGGTGACCTGAAAGTCACAGAATAATTTTTTA  
GAGCTGAACAAGAATCCAAGCCTGCAACTGCAGAGACGAGAGATCTTTCTGCTGTCTATACTCTTGGA  
AAGCACATCCTAAGATCTTTCAGATTATCCTGTGGAAGGAAA

**KCNH2** (NM\_000238.4)

AACCCTTCCGCGGCCCGGGCCGAGCCGCAGGCGCTGCCCCAGCCGCGGGCGCTGGAGCGGCTGTCCGCGCGGTG(0.82)GCAGGCGGGAGCCAGGAGTCCGGGGCTCGGGCGGGCGGAGCGCAGCGCGGGGACGCGGCGGAGCGGGGCCCCGCGGCTCGGCGGGGGCCGGCAGACAGGTGTGCCGGCGGCGGGCGGCTCGCGTCAAGCGGCTCCAGGCCGGGCCCCGGGGTCCGGAGCGGGGAGCCGGGAGCCGAGCGAGGACC  
CGGCGCCCCGAGTCCAGTCTTG(0.82)GCCGCGCCCCGTGCTCGGCTTG(0.86)GCCGCGGGGTGCGGGG  
ACCACG(0.91)GCCCCGCCGGGCCACCCGAAGCCTAGTGCTGGGCCGGGCCGGGCCGGGGTGGGTGG  
GGGCCCGCCCCGCCCCGCCCATGGGCTCAGG

**BCAP31** (NM\_001139457.2)

GATGGGCCTCCGGGACGGTGTGCCAGGCCGGGGCCAAGTCGGAGGCCCTCGCTCTGGGTGGGCGCTGGGGCCCGCGAGG(0.80)GCTACTGTAAGGACCCCTGGCTTCTGAGGATACTGCGTCTAGAACTTTCTCCGTATGGGGCCTTGAGGTGCTTGGTCGAGACCTGCCTTTGCGCTTGGTCCCGAATCCTGCCCTCTAGGAGTCGCTCTTGCGGGCCTCCAGCCCACCGGAGGCGAAGCGGCCCGGGCGGAAGGCCGCTGGATCCTCGAGGGAGGTGCCGTTTCTCTCCGCGGGCGCCGTG(0.89)GGGACGTG(0.82)GGAGGCGGGGCGTCGGCAGCGCTTGACTAGGTGCGGCCCTTG(0.82)GGCCTGCCTGGTAGCGGGGATTTGGGCCCGCAGAGCGCCCGCCTCTGCGGCTGAGTTCTGCCTGGCGGGGAAGGGAGCGCCCG

**NME1** ([NM\\_198175.1](#))

GCAGAAGCGTTCCGTGCGTGCAAGTGCTGCGAACCACGTGGGTCCCGGGCGCGTTTCGGGTGCTGGCGGCTGCAGCCGAGTTCAAACCTAAGCAGCTGGAAGGGCCCTGTGGCTAGGTACCATA(0.84)GAGTCTCTACACAGGACTAAGTCAGCCTG(0.86)GTGTGCAGGGGAGGCAGACACACAAACAGAAAATTGGACTACAGTGCTAAGATGCTGTAAGAAGAGGTTAACTAAAGGACAGGAAGATGGGGCCAAGAG

**RPA3** (NM\_002947.5)

AAGCTACTCAGATAAGAGGCTCCAAGAGGACATTTTTGGATGTGAAAAACAATGAGAAGGAGGACAA  
CACACATTTACAATCGTCTTAATTTTGTACTCAGAAAAAGGATGTGAAGACAATGCACAGGGAATACA

ATAGTTTCAGATCTGTGTACAGTTTCCTTTTGCTTCATCTCCTGCAACAATGTAATGAAGACACCATGAT  
ATCATTAACATTTACACAAAAGGAAAATGAGGCTGAAATGGTGTGGGC **AAG(0.80)**GCCCAGGAATCT  
GGAGCATCCCTAACCAAGCAGGAGAGCACCTGGGATAGAGAAAGTGCTCAAGAATGTTCACTTACTG  
ATTACTACAATCAAAAAAAGATACGACACTAATTTACCACATTCTTCTTACTTATTTTATGAGATACTATT  
CTTCCAAG **GTG(0.81)**GAGAAAGTGGAGAAAGTAGAGTGACGCAGCTAAGGGAGTAAATCGACCCCTCA  
GCCAACAAGTGGCAAAAGCCTGAAGAAAGTGATCAAGATCACTGATGACCCCGCTGCCCATCTCCAA  
GGGGGCGGGTATCACAACCCCGACGCCACACCACGTATCATTCCGCAAACTCCCGCGCCTCCACG  
CAGAACTGGCAAG **AGG(0.82)**GAAGGCGAGACAGCAGTGAACAGCTGGTACGCAGCACCCACAGCAC  
CGCGGCAGCAGCTAGTGCCGACTCCCGCCTAGCTCTTTTGA CTCTGTTCGCGGGAAGAATGGGGAAAC  
AGTAAGGTTGCGGCGCCTCCCGCGAGACGAGGTACCTGAGG **CTG(0.80)**GCCCCGCAGTCCCCCGCCG  
CACCAGCACCGGAGCTTCACACCCCACTTCCGGGGTCAAGTCACCGCCGGGAATCCTGTGATCGCAG  
AAAGGTAGTCTCAGGTTCCGCCCCTATCCAAGTCCCGCCTCCACTGCCTCTCGCCCTGTATCTGTCAAC  
TTCCGGGACGCCGCGCTACTAAGCAGCCAATCTCCACTTCCGGACTCATCCAGCCCCTTCTCCACC  
CCTTTCAGAGACAGCGCG **ATT(0.81)**GCGATTTAGGTTTCCGCGCATTTAATTGGCGAAG **CTG(0.81)**GA  
GCGCTAGTCTTCGCTGATTGGTGCCGAGAAATCTGCCCCATAGACACCCGCGGGGCGCACAGTTTCAG  
TCGTCCGTGGGTTTCCCGCCAGCCGCAGTCTTGACCATAATC

**ELOC** (NM\_005648.4)

CTTTCGACTGCCCCGGAACCCACCGGAGCAGGCAGCTGGGGGTGGGGGGGCGGCC **CTG(0.81)**GGAT  
AGGGGCTGTGGCAGTACGCGGGGACCCGGCTGCG **GTG(0.81)**GCTGCGGGACTGACGAGAACTACT  
AAAGTTCCTGGGGAAGCAAAGTAGAATTCATAAGAACAAA

**DRAP1** (NM\_006442.4)

GGGCGGCGAGCAGGCCCGGGAGCCGGGAGGCTGCGGGCGGCGGCG **CTG(0.81)**GACCCGACGCGGC  
GAGAGAGGCCCCGAG

**UBE2S** (NM\_014501.3)

GGCTCAGTGCTGCCGGGCACCGGGGCGGCGGGTTGGTCTACGCTGTGCGCGGCGGACGTCCGAGGC  
AGCGGGGAGCGGAGCGGGGCCCGGGGCTCTCCAGGGCCGCAGCGGCAGCAGTTGGGCCCCC  
GCCCCGCGCGGCGGACCGAAGAACGCAGG **AAG(0.83)**GGGGCCGGGGGACCCGCCCCCGGCCGCG  
CGCAGCC

**PSMB8** (NM\_004159.5)

AAACTCCGCAGTGCTCAGCCAAGC **AGG(0.81)**GAGCAACGCTAGGAAGGGCGGGCAGAA **AAG(0.80)**GG  
CACGCTCTTGTGGGTGACTACAGGTTAGGAGACCGTTGAAC **CTG(0.85)**GAGGGGCCCTAGG **ATG(0.8**

CTCGCGGGGTGCGCCTCTGGGATAGGCGACCACG(0.85)GTGTCTTCAAAAGCCCCGTCAGGGTTGGC  
TTCCTGGGGCCGGACCGACTGTGGGTCAGTTTGACCAGCGCTCTGGAATCGAGTTACGCGCGAAAG

GGCAGAGTTTCTGGAGGAAACCGCAGCCTCTCAACCGCTGACCGGGTCTCAGAAGGCCCCCGGCAGG  
(0.86)GCCGCTTGGCGGGAAGTACCACGCGCCAGTCAGGCTCTCCAGGGACCTGCGCAGGCGCGTGT  
GGGCGGAGTCGTGCGCAGGGGGCGGGGCTTCGGGAAGGAGCCACAGAGAGG(0.80)GCGGGGCGTA  
GGACCTGCGCTTCGGGGGTGGAGTCGGAGCGGCGCGGCGGCGGTC

***NUTF2*** (NM\_005796.3)

GCAGACCGCGCTGGGTTGCCGCTGCCGCTGCCGCCATC(0.86)GTGCCAGCCCCTCGGGTCTCCGTGA  
GGCCGGGTGACGCTCCAGA

***TRIM28*** (NM\_005762.3)

AGTGACGCAGAGGCTGGAGACGACTCTACGGCGGCGAAGAGACGCGGGTTGAGGAAGAGGGACGG  
ATTGCCCATGCGCTTGGGCGCACAGCGGCCCGCTTCTGTGTGGTCTGGAGGTGGAGCTGAGAGGGGA  
ATCACACTCTATAAAGTTTCGCATACCCCACTGGCGGATTCAATTGCGGCAGTGACGTCACAGAGGCC  
CCGCCCCGCCCCACAAGAGCCCCACCGACGTG(0.83)GGGTTG(0.82)GCGGTGGTGAAGGACTAG  
GAGTTGGCGCGTGCGTACTGGCGGCCTCTCCCGACCGACCGGCCTG(0.80)GGCCCCGCCCCGGGC  
GTGAGGCGCCCAATGCGCGTGCGCGGCGGCGTCGGCGCCAGTTATTTCTGTCCCGCCCCCGGCCTC  
GGCTCTTTCTGCGAGCGGGCGCGCGGGCGAGCGGTTGTGCTTGTGCTTGTGGCGCGTGGTGCGGGTTT  
CGGCGGCGGCTGAGGAAGAAGCGCGGGCGGCGCCTTCGGGAGGCGAGCAGGCAGCAGTTGGCCGT  
GCCGTAGCAGCGTCCCGCGCGCGGGCGGGCAGCGGCCAGGAGGCGCGTGGCGGCGCTCGGCCTCGC  
GGCGGCGGCGGCGGCAGCGGCCAGCAGTTGGCGGCGAGCGCGTCTGCGCCTGCGCGGCGGGCCC  
CGCGCCCCTCCTCCCCCCTGGGCGCCCCCGGCGGCGTGTGA

***PTDSS1*** (NM\_014754.3)

CCCTCTGCTCCAGCCTTTGCTGGGCGCCAGACCCGGCTTTGCCGTCCGGCTATTAGCCTACTGTGGCT  
AGTACCCCCGGGTCCCGGCCTTCTCGGGCTGGGGCCCGGCCACCGCGGCAGGACG(0.83)GGGA  
GGCGGGCC

***TCEA1*** (NM\_006756.4)

AGCCGGAAGCCACGCCTGCCCCTAGCCCGACGCCCGCCTGGCGGGAACATG(0.85)GGCTCGCCCC  
TCACCAGCGATCTGCAGTCAGTTGGTAGCGCCTGCACGTCGCGCGCGGTGTTTCGATTGTCGCTGCCTG  
GGGAGGAGGAGCCGGAGCCCGCCGCCGCCGCCGCCGCCGGGCTTCGTTTCGTAAGGAAG(0.82)  
GGGGCCTAGGCCCGGGCCTGCGGTGGTGGGGTTGCTGCGCGCCGGGGTTCGCTCCTGCTGTGTCTT  
CCGCTCCAGCTTCGCCCACTTCCCCTTGCCAGCGGGGTGGGCGCGGAGAAGACCTGCCGGAGCC



**PCNA** (NM\_002592.2)

GGATGGCCGGAGCTGGCGCCCTG(0.85)GTTCTGGAGGTAACCGGTTACTGAGGGCGAGAAGCGCCAC  
CCGGAGGCTCTAGCCTGACAAATGCTTGCTGACCTGGGCCAGAGCTCTTCCCTTACGCAAGTCTCAGC  
CGGTCGTCGCGACGTTGCCCCGCTCGCTCTGAGGCTCCTGAAGCCGAAACCAGCTAGACTTTCCTCCT  
TCCCGCCTGCCTGTAGCGGCGTTGTTGCCACTCCGCCACC

**FDPS** (NM\_002004.4)

GGGAACTACTCGACCCACAGAGCCGATCGCGGAGCGGATTCTGCTTTTAGGAGTACCCGCCAACAG(0.80)CGGGACCGAGCAGGAATCCGTATCTGGGAACAGG

**PSMD2** (NM\_002808.5)

GCAGCGGGCCGGCAGTG(0.81)GCGGCGGAG

**HMGA1** (NM\_145899.3)

CTTTTAAAGTCCCCTGAGCCGGTGCTGCGCTCCTCTAATTGGGACTCCGAGCCGGGGCTATTTCTGGC  
GCTGGCGCGGCTCCAAGAG(0.83)GCATCCGCATTTGCTACCAGCGGCGGCCGCGGCGGAGCCAGG  
CCGGTCCTCAGCGCCCAGCACCGCCGCTCCCGGCAACCCGGAGCGCGCACCGCAGGCCGGCGGCCG  
AGCTCGCGCATCCCAGCCATCACTCTTCCACCTGCTCCTTAGAGAAGGGAAG

**KPNB1** (NM\_002265.6)

CCCTCCCTGCGCGCCGCTCTCACTCACAGCCTCCCTTCCTTCTTTCTCCCTCCGCCTCCCGAGCACCA  
GCGCGCTCTGAGCTGCCCCAGGGTCCCTCCCCCGCCGCCAGCAGCCCATTGGAGGGAGGAAGTAA  
GGGAAGAGGAGAGGAG(0.80)GGGAGCCGGACCGACTACCCAGACAGAGCCGGTGAATGGGTTTGT  
GGTGACCCCCGCCCCCACCACCCCTCCCTTCCCACCCGACCCCCAACCCCCATCCCCAGTTCGAGC  
CGCCGCCCCGAAAGGCCGGGCGCGTCTTAGGAGGAGTCGCCGCCGCCGCCACCTCCGCC

**DYNLL1** (NM\_001037494.2)

CTTCGGGCGCTGACAGG(0.84)GAGAGCCTG(0.85)GGGCCGGGCCGTGTGGATGCCATCCCCGAGCGC  
GGTTCGCGCTCGGCTGAGGCGCTGGACAAGTGGCTTGGGCTCCCGCGCCTCAGTTTCTCTCTGTGGCG  
CCGCCTACCTCACAGACTTGTGAGCACTCACTGACGTGGGTAGCGCCAGGGCCTGCGGGGCGCAGG

AGAGCTG(0.80)GAGTCAGGCGGAGACCGCAGGCTGACCCCGCAGCGGCCGGGCTGTCGCGGCCCCC  
ACCTCAGGTAACC

**RUNX** (NM\_001024630.4)

ATTGCGCTCACAAACAACACAGAACCAAGTGCGGTGCAAACCTTCTCCAGGAGGACAGCAAG(0.8  
1)AAGTCTCTGGTTTTTAAATGGTTAATCTCCGCAGGTCCTACCAGCCACCGAGACCAACAGAGTCAT  
TTAAGGCTGCAAGCAGTATTTACAACAGAGGGTACAAGTTCTATCTGAAAAAAAAAAGGAGGGACT

**MRPL3** (NM\_007208.4)

CAGAGAGCATC(0.82)GGCCGGCGACCGTTCCGGCGGCCATT(0.84)GCGAAACTTCCCCACGGCTAC  
TGCGTCCACGTGGCGGTGGCGTGGGGACTCCCTGAAAGCAGAGCGGCAGG(0.83)GCGCCCGGAAGT  
CGTGAGTCGAGTCTTCCCGGGCTAATCC

**SPP1** (NM\_001040058.2)

AGCAGCAGGAGGAGGCAGAGCACAGCATC(0.84)GTCGGGACCAGACTCGTCTCAGGCCAGTTGCAG  
CCTTCTCAGCCAAACGCCGACCAG(0.83)GAAAACTCACTACC

**SNRPD2** (NM\_004597.6)

GCGTCCCAGAGGGAAGAGGGGCGGTGCCTGTCTCCGAAGCGAGGAGCGGATTGGCTTCACGGAGGC  
CGCGCCCCCGAAGTCACG(0.83)GCCGGCGGGCATTGGAAATAGCTTGTCATTTCCCTCCTTCAACCT  
GTACCATTCTTCAAGAAACGGCGCCAACGGAAGTGGGTCGCAGGAAGAGGAAGTCCCGCCTCTCTCT  
CCTCAGGCAGCAGCAACGCGGAGGAAACGGGAGTGAACGGAGAGCGTAGTGACCATC

**UCHL3** (NM\_001270952.2)

GCTCGGCAAGGCTCGGCTCGGAAGAGTCCAAGCGTGAGGGGAGAGGGCTGTGGATTCAGATACTGTT  
TTTCTCCCGAAATAGGAAATTGGCTTATTTTTTCTCCTCGGCAGCATCTTAATTTAAAATATGACACTTG  
ACCTACGGCCCTGCACGGAGCGGTTAAGAGG(0.80)GTCACCAACCAGTTTCTTAAACAATTAGGTCTA  
CATCCTAACTGGCAATTCGTTGATGTATATGGA
